# Supplementary material
Source: PubMed Central journal article supplement (PMC2643365)
Supplement: NIHMS89738-supplement-1.pdf [file NIHMS89738-supplement-1.pdf]

**Synthesis of NP-Gly and NP-Lys:** NP-Gly and NP-Lys were prepared according to literature procedures.<sup>1,2</sup>

### **Synthesis of Trit-C<sub>11</sub>-LysG1-(Boc)<sub>4</sub>**

A dichloromethane solution of LysG1-(Boc)<sub>4</sub>-OH<sup>3</sup> (2.50 g, 3.11 mmol), Trit-C<sub>11</sub>-OH (1.00 g, 2.24 mmol), *N, N'*-dicyclohexylcarbodiimide (DCC, 0.69 g, 3.34 mmol), and 4-dimethylaminopyridine (DMAP, 0.08 g, 0.65 mmol) was stirred at room temperature for 12 h. The solution was poured into a mixture of dichloromethane and distilled water. The organic layer was collected and purified by column chromatography on silica gel using n-hexane/ethyl acetate (1:2, v/v) as an eluent, to give **Trit-C<sub>11</sub>-LysG1-(Boc)<sub>4</sub>** as a white solid (Yield 2.40 g, 87 %).

<sup>1</sup>H NMR (400 MHz, CDCl<sub>3</sub>) δ 7.41 (m, 6H, *Ph*-), 7.27 (m, 6H, *Ph*-), 7.20 (m, 3H, *Ph*-), 7.00 (brs, 1H), 5.93 (brs, 1H), 5.60 (brs, 1H), 4.92 (brs, 1H), 4.76 (brs, 1H), 4.35 (brs, 2H), 4.11 (brm, 3H, -CH<sub>2</sub>-O- and COCH(R)NH-), 3.10 (brs, 6H, -CH<sub>2</sub>NHBoc), 2.12 (t, J = 7.3 Hz, 2H, -S-CH<sub>2</sub>-), 1.40 (m, 72H, -CH<sub>2</sub>- and CH<sub>3</sub>-); MS (ESI-MS) calcd for C<sub>68</sub>H<sub>106</sub>N<sub>6</sub>O<sub>12</sub>S 1231.7, found 1254.0 [M+Na]<sup>+</sup>.

### **Synthesis of HS-C<sub>11</sub>-LysG1**

A dichloromethane solution of **Trit-C<sub>11</sub>-LysG1-(Boc)<sub>4</sub>** (0.2 g, 0.16 mmol), trifluoroacetic acid (TFA, 0.6 ml), and triisopropylsilane (TIPS, 0.03 ml) was stirred at room temperature for 6 h under argon. After removal of the solvent at reduced pressure, the residue was purified by washing with diethyl ether (20 ml x 5). After drying residue under high vacuum, white solid of product was obtained (Yield 0.09 g, 94 %).

$^1\text{H}$  NMR (400 MHz,  $\text{CD}_3\text{OD}$ ) major peaks assigned  $\delta$  4.41 (brs, 1H), 4.13 (brs, 2H,  $-\text{CH}_2\text{-O-}$ ), 4.00 (brs, 1H), 3.86 (brs, 1H), 3.50 (brs, 1H), 3.23 (brs, 2H), 2.95 (brs, 6H,  $-\text{CH}_2\text{NHBoc}$ ), 2.51 (q,  $J=7.2$  Hz, 2H,  $\text{HS-CH}_2\text{-}$ ), 1.40 (m, 36H,  $-\text{CH}_2\text{-}$  and  $\text{CH}_3\text{-}$ ); MS (ESI-MS) calcd for  $\text{C}_{21}\text{H}_{47}\text{N}_7\text{O}_3\text{S}$  588.89, found 589.6  $[\text{M}+\text{H}]^+$

**Synthesis of NP-LysG1:** 1-Pentanethiol-protected gold colloids were dissolved in dichloromethane (DCM) and ligands were dissolved in DCM-methanol (10:1, v/v) mixture. These solutions were separately purged with argon. After 30 min of purging, they were mixed together and stirred at room temperature for  $\sim 48$  h. Then solvents were evaporated and excess ligands were removed by 5X washing with DCM-methanol (50:1, v/v) followed by dialysis (cut off 10 kDa, Pierce) for 2 days.

**Ethidium bromide (EtBr) exclusion assay:** Dye exclusion assay was tested with NP-Lys. A mixture of pDNA (1.2 nM), EtdBr (5  $\mu\text{M}$ ) and NP-Lys (0  $\mu\text{M}$ , 0.24  $\mu\text{M}$  and 2.4  $\mu\text{M}$ ) were incubated for 10 min in phosphate buffer saline (PBS, Sigma). Then fluorescence ( $\lambda_{\text{em}} = 595$  nm,  $\lambda_{\text{ex}} = 545$  nm) was monitored on a SpectroMax M5 micro-plate reader (Molecular Device). Nanoparticle absorbance was corrected using NP-TEG, a neutral particle. Addition of particles resulted in release of intercalated dyes and hence decreases fluorescence intensity.

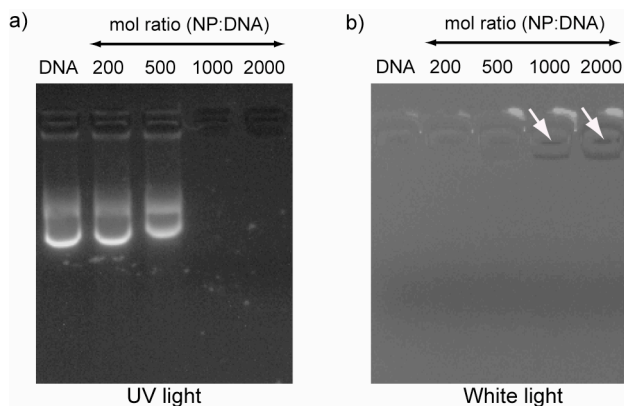

Figure S1: DNA and NP-Lys complexes were electrophoresed at different ratios and images were taken under ultraviolet (UV) light and white light. The nanoparticles (visible as black color) retained in wells at higher ratios ( $MR_{1000}$ ,  $MR_{2000}$ ) as indicated by arrows in white light image. The complete retardation at higher ratios probably arises from charge neutralization or the resultant complexes were too large to enter the gel.<sup>4</sup>

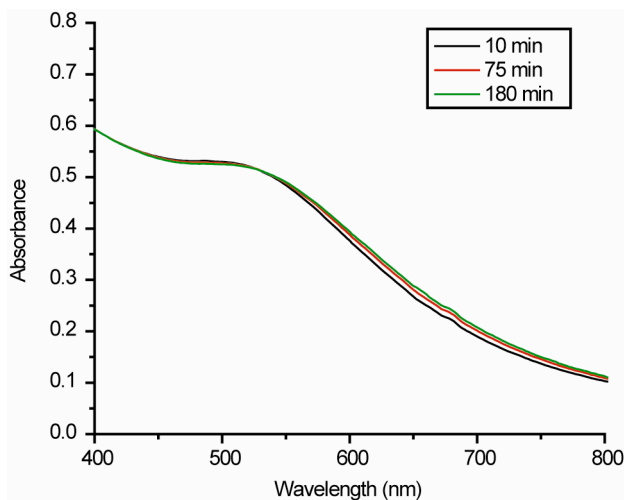

Figure S2: UV spectra of DNA:NP-Lys ( $MR_{2000}$ ) complex at different incubation time. Small red shift of surface plasmon resonance (SPR) band indicates no large aggregation over the period of 3 h. The incubation time was long enough for endocytosis, which can occur within 2 h.<sup>5</sup>

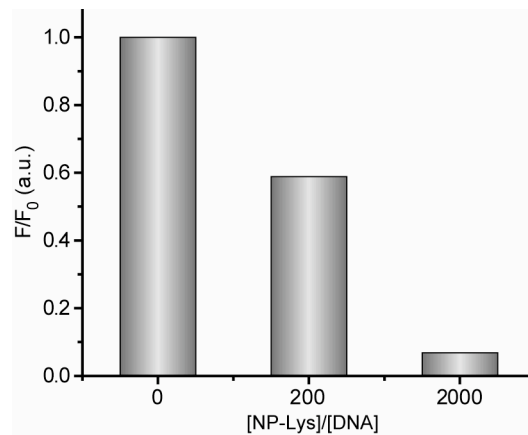

Figure S3: Addition of cationic nanoparticles (NP-Lys) displaced intercalated ethidium bromide within DNA and resulted decrease in fluorescence.

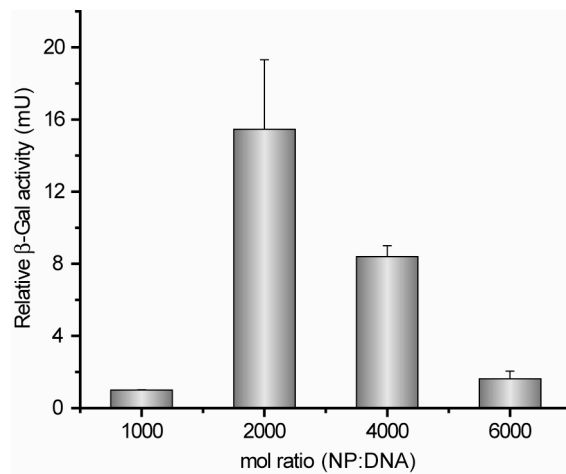

Figure S4. Transfection efficiency of NP-LysG1 at different mixing ratio. MR<sub>2000</sub> was the optimal ratio.

Reference:

---

- (1) Ghosh, P. S.; Han, G.; Erdogan, B.; Rosado, O.; Rotello, V. M. *J. Pept. Sci.* **2008**, *14*, 134-138.
- (2) Ghosh, P. S.; Han, G.; Erdogan, B.; Rosado, O.; Krovi, S. A.; Rotello, V. M. *Chem. Biol. Drug Des.* **2007**, *70*, 13-18.
- (3) Dykes, G. M.; Brierley, L. J.; Smith, D. K.; McGrail, P. T.; Seeley, G. J. *Chem. Eur. J.* **2001**, *7*, 4730-4739.
- (4) Lynn, D. M.; Langer, R. *J. Am. Chem. Soc.* **2000**, *122*, 10761-10768.
- (5) Lühmann, T.; Rimann, M.; Bittermann, A. G.; Hall, H. *Bioconjugate Chem.* **2008**, *19*, 1907-1916.
